# Supplementary material for: miR-19a promotes colorectal cancer proliferation and migration by targeting TIA1
Source: Mol Cancer. 2017 Mar 4;16:53. doi: 10.1186/s12943-017-0625-8 (PMC5336638; doi:10.1186/s12943-017-0625-8)
Supplement: Additional file 2: Table S2. — Detailed information on 273 significantly changed miRNAs in 429 primary solid colon tumors and 8 normal solid tissues from a meta-analysis using YM500. (XLSX 47 kb) [file 12943_2017_625_MOESM2_ESM.xlsx]

## Sheet: Sheet1
Number	miRNA Name	Base Mean	Base Mean A（Normal solid tissue）	Base Mean B（Primary solid tumor）	Fold Change	log2 Fold Change	pval	padj
1	hsa-miR-490-3p	8.69307	112.909	6.74965	0.0597795	-4.06421	4.6539e-05	0.000530028
2	hsa-miR-1	67.9064	2.00175	69.1354	34.5376	5.11009	0.00258672	0.0175783
3	hsa-miR-133b	5.81679	42.2219	5.13791	0.121688	-3.03874	0.000843281	0.00687337
4	hsa-miR-133a-3p	47.4001	594.452	37.1987	0.0625764	-3.99824	2.22526e-08	6.67579e-07
5	hsa-miR-1224-5p	6.91586	113.11	4.93556	0.0436351	-4.51837	0.00580483	0.0355221
6	hsa-miR-3195	25.9126	701.483	13.3145	0.0189805	-5.71934	2.37385e-05	0.000293451
7	hsa-miR-129-5p	14.295	248.359	9.93017	0.0399831	-4.64446	3.20651e-06	4.83927e-05
8	hsa-miR-139-3p	32.2417	781.407	18.2713	0.0233825	-5.41842	9.0513e-19	1.30978e-16
9	hsa-miR-187-3p	7.17057	116.46	5.13254	0.0440713	-4.50402	0.00274588	0.0185065
10	hsa-miR-217	90.8686	7.165	92.4295	12.9001	3.68931	0.000758969	0.00632903
11	hsa-miR-195-5p	80.5448	7.84976	81.9004	10.4335	3.38315	0.000311411	0.00287997
12	hsa-miR-218-5p	39.0711	6.80223	39.6729	5.83233	2.54407	0.003597	0.0231639
13	hsa-miR-125b-2-3p	4.77672	19.9695	4.49341	0.225014	-2.15191	0.000894237	0.00721253
14	hsa-miR-195-3p	5.62719	68.03	4.4635	0.0656108	-3.92992	5.54744e-17	6.20304e-15
15	hsa-miR-30c-2-3p	24.4819	137.922	22.3664	0.162167	-2.62445	2.74875e-07	5.87994e-06
16	hsa-miR-214-3p	19.1519	64.9793	18.2973	0.281587	-1.82835	0.000937018	0.00741613
17	hsa-miR-377-5p	4.24557	20.0804	3.95028	0.196723	-2.34576	0.000149289	0.00150513
18	hsa-miR-125b-5p	472.206	2693.84	430.777	0.159911	-2.64465	9.48142e-08	2.24272e-06
19	hsa-miR-145-5p	8152.05	86575.1	6689.61	0.0772695	-3.69396	1.80692e-11	8.38682e-10
20	hsa-miR-486-5p	296.997	7709.55	158.767	0.0205936	-5.60166	9.70838e-15	7.46332e-13
21	hsa-miR-144-3p	21.0433	0	21.4357	∞	∞	8.24982e-05	0.000897989
22	hsa-miR-144-5p	164.114	4.12232	167.097	40.5348	5.34109	2.99555e-07	6.22047e-06
23	hsa-miR-451a	695.148	118.347	705.904	5.9647	2.57645	0.00236685	0.0164012
24	hsa-miR-3150b-3p	6.16656	47.5483	5.39487	0.113461	-3.13973	6.30622e-08	1.63298e-06
25	hsa-miR-1273h-5p	4.89996	24.6778	4.53114	0.183612	-2.44527	1.19637e-06	2.04379e-05
26	hsa-miR-3614-5p	10.1006	46.3481	9.42464	0.203345	-2.298	1.30706e-05	0.000168344
27	hsa-miR-223-5p	9.86799	0.962526	10.0341	10.4247	3.38194	0.0030257	0.0200087
28	hsa-miR-150-3p	7.16098	72.0616	5.95071	0.0825782	-3.5981	6.95343e-15	5.51789e-13
29	hsa-miR-150-5p	1386.2	14495.9	1141.73	0.0787622	-3.66635	3.53845e-21	6.21757e-19
30	hsa-miR-375	73470.5	549550	64592.5	0.117537	-3.08881	9.94732e-13	5.82629e-11
31	hsa-miR-574-5p	56.7917	317.971	51.9212	0.163289	-2.6145	4.78847e-08	1.29447e-06
32	hsa-miR-23a-5p	10.6856	73.7732	9.50912	0.128897	-2.95571	3.35777e-08	9.49438e-07
33	hsa-miR-149-5p	42.3601	561.653	32.6763	0.0581788	-4.10336	8.21162e-14	5.61127e-12
34	hsa-miR-6511a-3p	8.19584	156.102	5.43768	0.0348341	-4.84335	1.58216e-30	1.29737e-27
35	hsa-miR-6511b-3p	5.22647	103.114	3.40106	0.0329834	-4.92212	1.10192e-27	4.51787e-25
36	hsa-miR-139-5p	91.8201	1906.71	57.9761	0.0304064	-5.03948	3.85865e-30	2.37307e-27
37	hsa-miR-328-3p	82.101	1942.38	47.4105	0.0244085	-5.35647	5.10262e-39	1.25524e-35
38	hsa-miR-339-5p	109.532	417.251	103.794	0.248756	-2.0072	2.44747e-05	0.000301039
39	hsa-miR-1296-5p	14.1093	159.075	11.406	0.0717018	-3.80185	6.64527e-15	5.44912e-13
40	hsa-miR-491-5p	3.95618	14.5749	3.75816	0.257851	-1.95539	0.00263817	0.0178294
41	hsa-miR-5010-3p	4.13403	29.6254	3.65867	0.123498	-3.01744	6.27985e-08	1.63298e-06
42	hsa-miR-1301-3p	10.1356	30.6277	9.75346	0.318452	-1.65085	0.00295108	0.0196207
43	hsa-miR-505-5p	16.7179	56.0949	15.9836	0.284938	-1.81128	0.000515734	0.00448305
44	hsa-miR-324-5p	43.3073	145.031	41.4103	0.285528	-1.8083	0.000192918	0.00186109
45	hsa-miR-505-3p	120.217	346.553	115.996	0.334714	-1.579	0.00174789	0.0128352
46	hsa-miR-484	169.439	1006.27	153.833	0.152875	-2.70958	1.45585e-09	5.19041e-08
47	hsa-miR-6892-5p	5.21212	32.8725	4.69631	0.142864	-2.80728	1.63741e-06	2.72165e-05
48	hsa-let-7e-3p	8.30628	49.8334	7.53188	0.151141	-2.72603	3.38894e-07	6.88992e-06
49	hsa-miR-125a-5p	524.996	6907.58	405.973	0.0587722	-4.08872	1.32132e-23	2.95495e-21
50	hsa-miR-99b-5p	20468.3	143837	18167.7	0.126307	-2.98499	8.48951e-11	3.60072e-09
51	hsa-miR-99b-3p	44.1388	246.446	40.3662	0.163794	-2.61005	8.47007e-08	2.05455e-06
52	hsa-miR-342-3p	96.497	283.644	93.0071	0.327901	-1.60867	0.000795937	0.00657048
53	hsa-miR-342-5p	9.22027	73.8808	8.01448	0.108479	-3.20452	2.61209e-12	1.36718e-10
54	hsa-miR-323a-3p	3.99989	14.5879	3.80245	0.260657	-1.93978	0.00131631	0.0100765
55	hsa-miR-331-3p	31.4319	122.984	29.7246	0.241695	-2.04874	4.22388e-05	0.00048329
56	hsa-let-7i-3p	128.09	381.415	123.366	0.323443	-1.62842	0.000745168	0.00623508
57	hsa-miR-29b-2-5p	35.2529	162.902	32.8725	0.201793	-2.30905	1.35867e-06	2.30505e-05
58	hsa-let-7b-3p	109.89	942.422	94.3645	0.10013	-3.32006	1.02358e-14	7.63034e-13
59	hsa-let-7c-5p	14017	98695.4	12438	0.126024	-2.98823	1.18198e-11	5.81535e-10
60	hsa-let-7b-5p	13437.7	129371	11275.8	0.0871587	-3.52021	9.79925e-18	1.14791e-15
61	hsa-miR-671-3p	5.98078	73.2663	4.72604	0.064505	-3.95444	2.29559e-18	3.13731e-16
62	hsa-miR-574-3p	91.6859	918.76	76.2627	0.0830061	-3.59064	6.0103e-17	6.42841e-15
63	hsa-miR-766-3p	25.1078	385.001	18.3965	0.047783	-4.38736	1.46438e-25	4.50297e-23
64	hsa-miR-4326	19.5717	63.8683	18.7456	0.293505	-1.76855	0.000773528	0.00642865
65	hsa-miR-18a-3p	5.80621	17.9642	5.57949	0.31059	-1.68692	0.00166536	0.0124145
66	hsa-miR-18a-5p	30.3168	0	30.8822	∞	∞	8.44446e-07	1.53877e-05
67	hsa-miR-18b-5p	21.4239	0	21.8234	∞	∞	5.08385e-06	7.22906e-05
68	hsa-miR-3130-5p	11.5858	32.1794	11.2018	0.348103	-1.52241	0.00719682	0.0430758
69	hsa-miR-937-3p	9.45757	45.2418	8.79027	0.194295	-2.36368	7.29115e-06	0.000100765
70	hsa-miR-7706	4.89464	42.476	4.19382	0.0987339	-3.34031	1.67218e-12	8.94251e-11
71	hsa-miR-1226-3p	3.50902	39.5984	2.83603	0.0716197	-3.8035	7.34046e-14	5.1593e-12
72	hsa-miR-6724-5p	3.75987	36.642	3.14668	0.0858764	-3.54159	3.26403e-12	1.67281e-10
73	hsa-miR-219a-1-3p	5.24751	29.4428	4.79631	0.162903	-2.61792	2.83329e-07	6.00852e-06
74	hsa-miR-194-3p	951.508	13263.8	721.909	0.0544271	-4.19953	8.58624e-28	4.22443e-25
75	hsa-miR-200c-3p	9833.1	33831.9	9385.57	0.277418	-1.84987	0.000179929	0.00175717
76	hsa-miR-92a-3p	23315.8	108179	21733.3	0.200901	-2.31544	1.4141e-06	2.38266e-05
77	hsa-miR-939-5p	5.09127	23.4538	4.74884	0.202476	-2.30418	3.39655e-05	0.000400378
78	hsa-miR-128-1-5p	17.5886	62.4558	16.7519	0.26822	-1.89851	0.000226608	0.00214406
79	hsa-miR-200b-5p	226.493	616.796	219.215	0.355409	-1.49245	0.00317308	0.0208513
80	hsa-miR-378a-3p	2876.29	15754.6	2636.14	0.167325	-2.57927	1.8676e-08	5.74288e-07
81	hsa-miR-378c	376.641	1122.94	362.724	0.323012	-1.63034	0.00125696	0.0096629
82	hsa-miR-378i	376.722	1170.79	361.914	0.309119	-1.69377	0.000711315	0.00599259
83	hsa-miR-532-3p	72.7901	618.899	62.6063	0.101157	-3.30533	6.65637e-14	4.81608e-12
84	hsa-miR-1306-5p	20.1168	284.524	15.1861	0.0533739	-4.22772	2.81823e-23	5.77738e-21
85	hsa-let-7d-3p	421.852	5759.31	322.319	0.0559649	-4.15933	3.44815e-25	9.42494e-23
86	hsa-miR-197-3p	313.841	5951.1	208.718	0.0350721	-4.83353	7.64907e-38	9.40835e-35
87	hsa-miR-92b-3p	87.9536	725.574	76.0633	0.104832	-3.25385	3.59787e-13	2.26942e-11
88	hsa-miR-378a-3p	2876.29	15754.6	2636.14	0.167325	-2.57927	1.8676e-08	5.74288e-07
89	hsa-miR-324-3p	28.8319	242.789	24.8421	0.10232	-3.28884	9.07625e-14	6.03448e-12
90	hsa-miR-744-5p	58.4213	589.829	48.5116	0.082247	-3.60389	1.93964e-16	1.98813e-14
91	hsa-miR-589-5p	132.895	665.425	122.965	0.184791	-2.43603	3.35307e-07	6.8738e-06
92	hsa-miR-106b-3p	992.159	2760.6	959.181	0.347453	-1.52511	0.0041111	0.0261326
93	hsa-miR-652-3p	60.7584	253.011	57.1732	0.225972	-2.14579	3.97543e-06	5.75268e-05
94	hsa-miR-423-3p	179.802	1605.54	153.214	0.0954288	-3.38943	9.93599e-16	9.40098e-14
95	hsa-miR-1180-3p	33.6093	385.069	27.0553	0.070261	-3.83113	2.51664e-19	4.04319e-17
96	hsa-miR-4746-5p	8.55389	35.2008	8.05698	0.228886	-2.1273	3.4255e-05	0.000401273
97	hsa-miR-1266-5p	63.234	195.981	60.7586	0.310023	-1.68955	0.000592896	0.00502939
98	hsa-miR-1307-3p	3169.66	26536	2733.92	0.103027	-3.2789	6.54444e-15	5.44912e-13
99	hsa-miR-3127-5p	22.1309	177.577	19.2322	0.108304	-3.20685	9.46085e-13	5.67651e-11
100	hsa-miR-3934-5p	3.78053	10.5751	3.65382	0.345512	-1.53319	0.00803954	0.0473141
101	hsa-miR-671-5p	4.93847	0	5.03057	∞	∞	0.00327618	0.0213212
102	hsa-miR-877-5p	6.23698	24.65	5.89362	0.239092	-2.06436	0.000253063	0.00237609
103	hsa-miR-2110	3.96544	31.0644	3.46009	0.111385	-3.16638	6.02227e-09	2.02942e-07
104	hsa-miR-6842-3p	8.30235	46.8673	7.58319	0.161801	-2.62771	1.14104e-06	1.97673e-05
105	hsa-miR-330-3p	7.36341	25.8229	7.01918	0.27182	-1.87927	0.000925293	0.00736641
106	hsa-miR-326	82.3088	692.383	70.9322	0.102446	-3.28706	1.14185e-12	6.53244e-11
107	hsa-miR-941	22.5574	123.388	20.6771	0.167577	-2.5771	1.9667e-07	4.28149e-06
108	hsa-miR-15b-5p	460.765	2518.99	422.383	0.16768	-2.57622	1.91299e-08	5.80983e-07
109	hsa-miR-185-3p	6.56165	27.2349	6.17614	0.226773	-2.14068	0.000180003	0.00175717
110	hsa-miR-598-3p	34.9598	4.75434	35.5231	7.4717	2.90144	0.00231684	0.0161001
111	hsa-miR-411-5p	21.6218	1.1177	22.0042	19.6871	4.29918	0.000398295	0.00356293
112	hsa-miR-340-5p	32.0044	1.15468	32.5797	28.2154	4.81841	6.06186e-05	0.000677826
113	hsa-miR-1468-5p	12.3878	65.0234	11.4063	0.175418	-2.51113	2.89016e-07	6.07674e-06
114	hsa-miR-664a-3p	34.887	86.0448	33.933	0.394365	-1.3424	0.00721463	0.0430776
115	hsa-miR-181b-5p	340.167	988.435	328.078	0.331917	-1.59111	0.00117028	0.00903821
116	hsa-miR-181a-5p	2146.55	21790.2	1780.24	0.0816989	-3.61354	2.62972e-19	4.04319e-17
117	hsa-miR-423-5p	55.9732	216.441	52.9808	0.244782	-2.03043	0.000171487	0.00168743
118	hsa-miR-320b	530.705	1552.19	511.657	0.329635	-1.60106	0.00187284	0.0134377
119	hsa-miR-320a	627.83	2339.3	595.914	0.25474	-1.9729	6.75834e-05	0.000748897
120	hsa-miR-874-3p	53.6441	306.512	48.9287	0.159631	-2.64719	1.50682e-08	4.69211e-07
121	hsa-miR-193b-3p	30.0868	199.306	26.9312	0.135124	-2.88764	5.50063e-10	2.1143e-08
122	hsa-miR-193b-5p	8.04803	92.2188	6.47841	0.0702504	-3.83135	6.88718e-18	8.47123e-16
123	hsa-miR-3615	6.40132	66.1447	5.28723	0.0799343	-3.64504	3.11481e-15	2.83794e-13
124	hsa-miR-654-5p	6.67973	34.1516	6.16743	0.18059	-2.46921	1.11418e-06	1.94389e-05
125	hsa-miR-370-3p	8.61985	44.6586	7.9478	0.177968	-2.49031	3.43968e-06	5.09735e-05
126	hsa-miR-432-5p	13.9914	88.7946	12.5965	0.141861	-2.81745	2.37583e-08	6.95778e-07
127	hsa-miR-127-3p	1096.21	3635.63	1048.86	0.288494	-1.79339	0.000632207	0.00534443
128	hsa-miR-431-3p	23.7583	92.7121	22.4725	0.24239	-2.0446	0.000190485	0.00184485
129	hsa-miR-193a-5p	369.277	3179.98	316.863	0.099643	-3.32709	2.69864e-13	1.74702e-11
130	hsa-miR-146b-3p	89.7518	782.027	76.8423	0.0982605	-3.34725	5.47597e-16	5.38835e-14
131	hsa-miR-361-3p	233.545	1571.49	208.595	0.132737	-2.91335	2.98852e-11	1.31282e-09
132	hsa-miR-140-3p	709.164	3006.67	666.32	0.221614	-2.17388	7.14678e-06	9.93282e-05
133	hsa-miR-132-3p	253.192	1082.85	237.72	0.219532	-2.18749	5.9278e-06	8.3328e-05
134	hsa-miR-26a-1-3p	10.0573	0	10.2448	∞	∞	0.00051989	0.00450327
135	hsa-miR-577	279.202	1.70948	284.377	166.353	7.3781	2.89381e-06	4.44923e-05
136	hsa-miR-1307-5p	1383.65	63.2495	1408.27	22.2654	4.47673	8.74216e-06	0.000117518
137	hsa-miR-301a-5p	17.046	1.05843	17.3442	16.3867	4.03445	0.00142769	0.0108734
138	hsa-miR-7704	13.0921	88.9347	11.6777	0.131307	-2.92899	0.000201244	0.00192898
139	hsa-miR-7641	953.871	6822.9	844.425	0.123763	-3.01434	2.44608e-06	3.80846e-05
140	hsa-miR-4492	4.67277	30.0988	4.19863	0.139495	-2.84172	0.00281441	0.018865
141	hsa-miR-4532	24.0176	316.258	18.5679	0.0587113	-4.09022	0.000437702	0.00385931
142	hsa-miR-3656	44.3464	521.753	35.4437	0.0679321	-3.87976	2.0322e-06	3.24625e-05
143	hsa-miR-642a-5p	7.16603	103.721	5.36547	0.0517297	-4.27286	6.56223e-27	2.30616e-24
144	hsa-miR-642b-5p	6.52975	94.8803	4.88219	0.0514563	-4.28051	9.16324e-25	2.25416e-22
145	hsa-miR-3605-3p	9.70617	52.2424	8.91295	0.170608	-2.55125	5.48377e-07	1.05315e-05
146	hsa-miR-628-5p	54.6801	0	55.6997	∞	∞	6.87186e-08	1.74276e-06
147	hsa-miR-1273h-3p	8.64038	65.4148	7.58165	0.115901	-3.10903	1.51241e-12	8.26787e-11
148	hsa-miR-503-3p	3.86982	13.6883	3.68672	0.269334	-1.89253	0.00408003	0.0260698
149	hsa-miR-3928-3p	3.59223	18.9962	3.30498	0.173981	-2.523	2.40566e-06	3.76938e-05
150	hsa-miR-455-3p	622.759	1554.32	605.387	0.389486	-1.36036	0.00651721	0.0393915
151	hsa-miR-629-3p	15.1898	74.7693	14.0788	0.188296	-2.40892	1.84082e-07	4.07966e-06
152	hsa-miR-3074-5p	18.3973	78.0643	17.2846	0.221415	-2.17518	7.44982e-06	0.000102383
153	hsa-miR-222-5p	33.0569	0.872917	33.6571	38.557	5.26892	1.51979e-05	0.000194724
154	hsa-miR-191-3p	18.8952	67.2997	17.9926	0.26735	-1.9032	5.01073e-05	0.000565431
155	hsa-miR-296-5p	9.96277	69.1703	8.85867	0.128071	-2.96499	1.88677e-06	3.0943e-05
156	hsa-miR-33a-5p	145.295	1.67313	147.973	88.4408	6.46664	1.94041e-07	4.26198e-06
157	hsa-miR-33b-5p	15.9355	0.318113	16.2267	51.0093	5.67269	0.000856174	0.00695111
158	hsa-miR-3142	4.20698	29.9302	3.7273	0.124533	-3.0054	0.000257515	0.00240869
159	hsa-miR-3653	23.6672	159.32	21.1375	0.132673	-2.91405	3.35757e-06	5.00584e-05
160	hsa-miR-1268a	20.9739	155.225	18.4703	0.118991	-3.07108	1.41706e-11	6.72823e-10
161	hsa-miR-1268b	12.6218	102.42	10.9472	0.106886	-3.22586	1.16898e-12	6.53567e-11
162	hsa-miR-7977	5.34718	27.6041	4.93214	0.178674	-2.4846	0.00043651	0.00385931
163	hsa-miR-4286	59.1355	405.876	52.6694	0.129767	-2.946	2.08461e-11	9.49654e-10
164	hsa-miR-1260a	164.161	962.195	149.279	0.155144	-2.68832	3.54626e-08	9.80202e-07
165	hsa-miR-1260b	156.093	813.699	143.83	0.17676	-2.50013	1.02606e-06	1.81591e-05
166	hsa-miR-1247-5p	120.535	486.608	113.708	0.233676	-2.09742	0.000139322	0.00142342
167	hsa-miR-592	93.5742	0	95.3192	∞	∞	1.01618e-07	2.38077e-06
168	hsa-miR-552-3p	101.918	6.58791	103.696	15.7403	3.97639	5.14861e-05	0.000578337
169	hsa-miR-552-5p	342.327	9.63528	348.531	36.1724	5.17682	6.79474e-07	1.24739e-05
170	hsa-miR-338-5p	16.426	48.3837	15.83	0.327178	-1.61185	0.00530534	0.0330409
171	hsa-miR-338-3p	1146.72	189.949	1164.56	6.13092	2.6161	0.00241091	0.016613
172	hsa-miR-10b-5p	137003	23387.2	139122	5.94863	2.57256	0.0029645	0.0196568
173	hsa-miR-10a-5p	146523	24891.2	148791	5.97765	2.57958	0.00294494	0.0196207
174	hsa-miR-10a-3p	20.4245	3.10611	20.7475	6.67957	2.73976	0.00484343	0.030395
175	hsa-miR-199b-5p	252.6	20.3482	256.931	12.6267	3.65841	7.10916e-05	0.000780738
176	hsa-miR-708-3p	83.7496	2.11686	85.2719	40.2823	5.33207	1.9383e-06	3.15776e-05
177	hsa-miR-708-5p	56.4957	1.51696	57.5209	37.9184	5.24483	3.86855e-06	5.63115e-05
178	hsa-miR-455-5p	38.0573	3.50018	38.7018	11.0571	3.4669	0.000286022	0.00265515
179	hsa-miR-136-3p	10.0408	0.318113	10.2221	32.1337	5.00601	0.000888164	0.00718712
180	hsa-miR-369-3p	7.09095	0	7.22319	∞	∞	0.000817898	0.00670676
181	hsa-miR-376a-3p	7.2329	0.481263	7.3588	15.2906	3.93457	0.00334231	0.0216371
182	hsa-miR-376c-3p	5.01555	0	5.10908	∞	∞	0.00286668	0.0191632
183	hsa-miR-495-3p	6.23375	0	6.34999	∞	∞	0.00131895	0.0100765
184	hsa-miR-337-3p	32.5428	4.42886	33.0671	7.46629	2.90039	0.00333207	0.0216277
185	hsa-miR-889-3p	19.8904	1.07995	20.2412	18.7427	4.22826	0.0001197	0.00125303
186	hsa-miR-152-3p	349.014	59.4552	354.414	5.96102	2.57556	0.00207245	0.0146081
187	hsa-miR-379-5p	1867.4	121.84	1899.95	15.5938	3.9629	1.88082e-05	0.000236062
188	hsa-miR-582-5p	26.3324	0.871829	26.8072	30.7482	4.94243	8.70892e-05	0.000939647
189	hsa-miR-582-3p	930.394	23.0351	947.315	41.1248	5.36194	1.05659e-07	2.45208e-06
190	hsa-miR-24-2-5p	61.7216	3.40258	62.8092	18.4593	4.20627	2.79883e-05	0.000339168
191	hsa-miR-22-5p	56.8837	8.41751	57.7875	6.86515	2.77929	0.00183343	0.0133439
192	hsa-miR-16-5p	1160.92	72.3448	1181.22	16.3276	4.02924	3.40159e-05	0.000400378
193	hsa-miR-30e-5p	10047.4	1979.51	10197.9	5.15173	2.36506	0.00525468	0.0328084
194	hsa-miR-126-3p	1800.67	159.642	1831.27	11.4711	3.51993	0.000111991	0.00118239
195	hsa-miR-126-5p	425.509	8.42329	433.287	51.4391	5.68479	8.55958e-08	2.05455e-06
196	hsa-miR-26a-2-3p	11.4632	0	11.677	∞	∞	0.000109192	0.00115782
197	hsa-miR-590-3p	10.8234	0	11.0252	∞	∞	0.000136378	0.00140962
198	hsa-miR-16-2-3p	11.9262	0.531814	12.1387	22.825	4.51254	0.00154171	0.0115982
199	hsa-miR-15b-3p	47.4232	3.96085	48.2336	12.1776	3.60616	0.00035292	0.00318016
200	hsa-miR-7-1-3p	89.5511	7.62556	91.0788	11.9439	3.5782	0.000182143	0.00177104
201	hsa-miR-30b-5p	810.229	93.2197	823.6	8.83504	3.14324	0.000456137	0.00400749
202	hsa-miR-106b-5p	713.193	27.6884	725.977	26.2196	4.71257	1.95385e-06	3.16215e-05
203	hsa-miR-32-5p	68.6603	0.272588	69.9355	256.562	8.00316	7.15747e-08	1.79667e-06
204	hsa-miR-454-3p	16.5098	0	16.8177	∞	∞	1.70427e-05	0.000217228
205	hsa-miR-29b-3p	2310.67	102.829	2351.84	22.8713	4.51547	3.68154e-06	5.39571e-05
206	hsa-miR-140-5p	104.068	7.18483	105.875	14.7359	3.88126	6.17083e-05	0.000686889
207	hsa-miR-26b-5p	2041.82	289.814	2074.49	7.15799	2.83955	0.000813357	0.00669183
208	hsa-let-7f-2-3p	23.481	0.318113	23.9129	75.1711	6.23211	1.73307e-05	0.00021976
209	hsa-let-7a-3p	93.2591	2.22794	94.9567	42.6209	5.41349	2.06014e-06	3.24868e-05
210	hsa-miR-203a	33470	1635.82	34063.6	20.8236	4.38015	8.23424e-06	0.000111884
211	hsa-miR-203b-3p	539.822	11.1671	549.681	49.2231	5.62126	1.12322e-07	2.58173e-06
212	hsa-miR-3677-3p	19.8986	2.73801	20.2186	7.38441	2.88448	0.00569537	0.0349392
213	hsa-miR-188-5p	15.9861	1.25186	16.2609	12.9894	3.69926	0.000924392	0.00736641
214	hsa-miR-4791	10.5108	0.259227	10.702	41.2842	5.36752	0.000959513	0.00756539
215	hsa-miR-215-5p	5175.58	272.184	5267.02	19.3509	4.27433	7.54155e-06	0.000103068
216	hsa-miR-148a-3p	90921.9	7544.82	92476.7	12.257	3.61553	0.000144515	0.00146904
217	hsa-miR-192-5p	181691	25831.7	184597	7.14616	2.83717	0.00185332	0.0134377
218	hsa-miR-7-5p	36.8128	0	37.4993	∞	∞	3.00909e-07	6.22047e-06
219	hsa-miR-96-5p	47.2716	1.27245	48.1293	37.8241	5.24123	1.03728e-05	0.000137931
220	hsa-miR-183-5p	21744	3172.54	22090.3	6.96298	2.7997	0.00117203	0.00903821
221	hsa-miR-182-5p	39010.4	1219.71	39715.1	32.5612	5.02508	5.52264e-07	1.05315e-05
222	hsa-miR-374b-3p	6.02201	0	6.13431	∞	∞	0.00160753	0.0120198
223	hsa-miR-374a-3p	1178.29	6.22359	1200.14	192.837	7.59124	6.66507e-11	2.8765e-09
224	hsa-miR-452-5p	258.982	10.6336	263.614	24.7907	4.63172	5.14761e-06	7.27765e-05
225	hsa-miR-2355-5p	75.5724	3.81888	76.9105	20.1395	4.33196	2.32373e-05	0.000288706
226	hsa-miR-101-3p	9467.78	241.975	9639.82	39.8382	5.31608	1.57592e-07	3.55666e-06
227	hsa-miR-21-5p	484311	4983.41	493249	98.9783	6.62904	2.17468e-09	7.64245e-08
228	hsa-miR-660-5p	112.392	9.46765	114.311	12.0739	3.59382	0.000139449	0.00142342
229	hsa-miR-374a-5p	86.498	1.62065	88.0808	54.3489	5.76418	4.35277e-07	8.63534e-06
230	hsa-miR-374b-5p	167.3	10.7568	170.219	15.8243	3.98407	2.97093e-05	0.00035826
231	hsa-miR-548f-3p	4.41982	0	4.50224	∞	∞	0.00510402	0.0319488
232	hsa-miR-190a-5p	11.7817	0	12.0014	∞	∞	8.77752e-05	0.000942912
233	hsa-miR-651-5p	8.46903	0.259227	8.62213	33.2609	5.05576	0.00196934	0.0139613
234	hsa-miR-141-5p	1790.03	57.2367	1822.34	31.8386	4.99271	9.5555e-07	1.7158e-05
235	hsa-miR-4677-3p	8.27077	0.259227	8.42017	32.4818	5.02156	0.0022819	0.0159022
236	hsa-miR-185-5p	124.778	16.9378	126.789	7.48559	2.90412	0.00143926	0.0109277
237	hsa-miR-21-3p	2293.77	362.673	2329.78	6.42392	2.68345	0.00240066	0.0165888
238	hsa-miR-16-1-3p	10.5433	0.599242	10.7288	17.9039	4.1622	0.0025199	0.0172193
239	hsa-miR-20a-5p	1245.15	40.4808	1267.62	31.314	4.96874	1.15728e-06	1.99085e-05
240	hsa-miR-19b-1-5p	32.2518	1.81228	32.8194	18.1095	4.17867	0.000152605	0.00153227
241	hsa-miR-17-5p	1076.1	92.8285	1094.43	11.7898	3.55947	0.000165209	0.00163877
242	hsa-miR-106a-5p	738.39	59.7997	751.045	12.5593	3.65069	0.000137237	0.00141257
243	hsa-miR-153-3p	8.69472	0	8.85686	∞	∞	0.000314328	0.00289606
244	hsa-miR-153-5p	102.365	1.4084	104.248	74.0188	6.20982	3.00669e-06	4.59407e-05
245	hsa-miR-135b-3p	5.73676	0	5.84374	∞	∞	0.00410908	0.0261326
246	hsa-miR-135b-5p	79.3185	0.340015	80.7913	237.611	7.89246	3.87647e-08	1.05957e-06
247	hsa-miR-135a-5p	126.453	0.871829	128.794	147.729	7.20681	3.53707e-08	9.80202e-07
248	hsa-miR-503-5p	23.7435	0.858469	24.1702	28.155	4.81532	0.000135964	0.00140962
249	hsa-miR-542-3p	357.757	3.92346	364.355	92.8657	6.53707	6.5884e-09	2.1902e-07
250	hsa-miR-450b-5p	23.1153	0	23.5464	∞	∞	3.18772e-06	4.83927e-05
251	hsa-miR-450a-5p	14.2429	0	14.5085	∞	∞	3.25447e-05	0.000386763
252	hsa-miR-424-5p	333.421	1.98992	339.602	170.661	7.41499	7.47804e-10	2.83015e-08
253	hsa-miR-101-5p	15.1113	0.636226	15.3812	24.1758	4.59549	0.000495683	0.00433943
254	hsa-miR-193a-3p	19.1093	2.1475	19.4256	9.04566	3.17723	0.00167788	0.0124655
255	hsa-miR-98-3p	11.9518	0	12.1747	∞	∞	8.44182e-05	0.00091484
256	hsa-miR-3613-5p	34.8443	0	35.4941	∞	∞	4.64681e-07	9.14492e-06
257	hsa-miR-19b-3p	311.628	0.889942	317.423	356.679	8.47848	1.00989e-10	4.21071e-09
258	hsa-miR-19a-3p	154.14	0	157.015	∞	∞	1.93219e-10	7.79211e-09
259	hsa-miR-335-5p	44.968	0	45.8065	∞	∞	1.13344e-07	2.58173e-06
260	hsa-miR-335-3p	308.211	14.4669	313.689	21.6832	4.4385	1.15423e-05	0.000151753
261	hsa-miR-141-3p	868.102	26.8161	883.79	32.9574	5.04253	1.06232e-06	1.86665e-05
262	hsa-miR-200a-3p	800.157	59.297	813.973	13.7271	3.77895	7.53292e-05	0.000823599
263	hsa-miR-429	327.079	7.66361	333.035	43.4567	5.44151	3.5561e-07	7.1705e-06
264	hsa-miR-142-5p	243.358	1.40326	247.87	176.638	7.46465	2.26023e-09	7.83121e-08
265	hsa-miR-142-3p	6616.12	50.0881	6738.57	134.534	7.07183	5.46343e-10	2.1143e-08
266	hsa-miR-301a-3p	20.4578	0.259227	20.8344	80.3714	6.32861	4.02488e-05	0.000462673
267	hsa-miR-590-5p	47.2319	0.272588	48.1076	176.485	7.4634	6.51143e-07	1.20437e-05
268	hsa-miR-29a-5p	32.5386	1.88435	33.1102	17.5711	4.13514	0.000167068	0.00165055
269	hsa-miR-181b-3p	18.3239	0	18.6656	∞	∞	1.30249e-05	0.000168344
270	hsa-miR-136-5p	64.7358	1.71618	65.911	38.4057	5.26325	2.60792e-06	4.0349e-05
271	hsa-miR-127-5p	596.815	48.0623	607.048	12.6304	3.65883	9.92739e-05	0.0010572
272	hsa-miR-199a-3p	3749.7	480.64	3810.66	7.92829	2.98701	0.000917221	0.00734972
273	hsa-miR-199b-3p	3749.7	480.64	3810.66	7.92829	2.98701	0.000917221	0.00734972
